# Supplementary material for: Early Cancer Detection via Multi-microRNA Profiling of Urinary Exosomes Captured by Nanowires
Source: PubMed Central journal article supplement (PMC11525924; doi:10.1021/acs.analchem.4c02488), 2024-10-18
Supplement: ac4c02488_si_001.pdf [file ac4c02488_si_001.pdf]

# *Supporting Information*

## Early cancer detection via multi-microRNA profiling of urinary exosomes captured by nanowires

*Takao Yasui<sup>1-4\*</sup>, Atsushi Natsume<sup>3-5\*</sup>, Takeshi Yanagida<sup>6,7\*</sup>, Kazuki Nagashima<sup>8</sup>, Takashi Washio<sup>7</sup>, Yuki Ichikawa<sup>4</sup>, Kunanon Chattrairat<sup>1</sup>, Tsuyoshi Naganawa<sup>9</sup>, Mikiko Iida<sup>3</sup>, Yotaro Kitano<sup>10</sup>, Kosuke Aoki<sup>10</sup>, Mika Mizunuma<sup>4</sup>, Taisuke Shimada<sup>2</sup>, Kazuya Takayama<sup>4</sup>, Takahiro Ochiya<sup>11</sup>, Tomoji Kawai<sup>7</sup>, and Yoshinobu Baba<sup>2,3\*</sup>*

<sup>1</sup>Department of Life Science and Technology, Tokyo Institute of Technology, Nagatsuta 4259, Midori-ku, Yokohama 226-8501, Japan.

<sup>2</sup>Institute of Quantum Life Science, National Institutes for Quantum Science and Technology (QST), Anagawa 4-9-1, Inage-ku, Chiba 263-8555, Japan.

<sup>3</sup>Institute of Nano-Life-Systems, Institutes of Innovation for Future Society, Nagoya University, Furo-cho, Chikusa-ku, Nagoya 464-8603, Japan.

<sup>4</sup>Craif Inc., 3-38-14-3 Hongo, Bunkyo-ku, Tokyo 113-0033, Japan.

<sup>5</sup>Kawamura Medical Society, Gifu 501-3144, Japan

<sup>6</sup>Department of Applied Chemistry, Graduate School of Engineering, The University of Tokyo, 7-3-1 Hongo, Bunkyo-ku, Tokyo 113-8656, Japan.

<sup>7</sup>The Institute of Scientific and Industrial Research, Osaka University, 8-1 Mihogaoka, Ibaraki, Osaka 567-0047, Japan.

<sup>8</sup>Research Institute for Electronic Science (RIES), Hokkaido University, N21W10, Kita, Sapporo, Hokkaido 001-0021, Japan.

<sup>9</sup>Department of Biomolecular Engineering, Graduate School of Engineering, Nagoya University, Furo-cho, Chikusa-ku, Nagoya 464-8603, Japan.

<sup>10</sup>Department of Neurosurgery, School of Medicine, Nagoya University, 65 Tsurumai-cho, Showa-ku, Nagoya 466-8550, Japan.

<sup>11</sup>Department of Molecular and Cellular Medicine, Tokyo Medical University, 6-7-1 Nishishinjyuku, Shinjuku-ku, Tokyo 160-0023, Japan.

\*Corresponding authors: [yasuit@bio.titech.ac.jp](mailto:yasuit@bio.titech.ac.jp); [atsushi.natsume@mirai.nagoya-u.ac.jp](mailto:atsushi.natsume@mirai.nagoya-u.ac.jp); [yanagida@g.ecc.u-tokyo.ac.jp](mailto:yanagida@g.ecc.u-tokyo.ac.jp); [babaymtt@chembio.nagoya-u.ac.jp](mailto:babaymtt@chembio.nagoya-u.ac.jp).

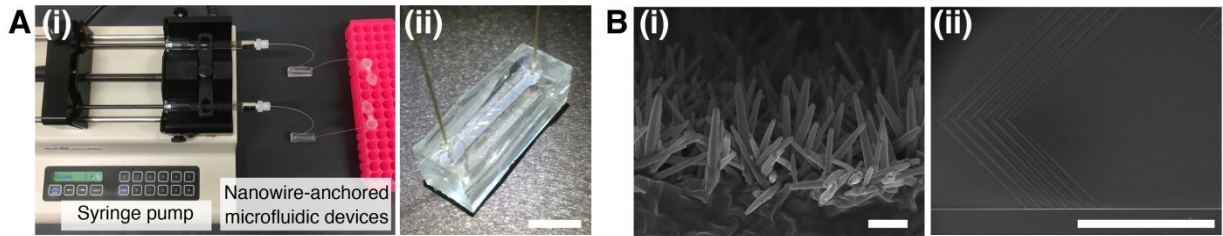

**Figure S1.** (A) (i) Photo of the experimental setup, including a syringe pump, two nanowire-anchored microfluidic devices, and two 1.5 mL tubes. (ii) Photo of the nanowire-anchored microfluidic device; scale bar, 1 cm. The device consisted of nanowires, which were anchored into polydimethylsiloxane (PDMS), and the PDMS microfluidic herringbone structure. (B) SEM image of nanowires anchored into PDMS; scale bar, 1  $\mu\text{m}$ . (ii) SEM image of the PDMS microfluidic herringbone structure; scale bar, 1 mm.

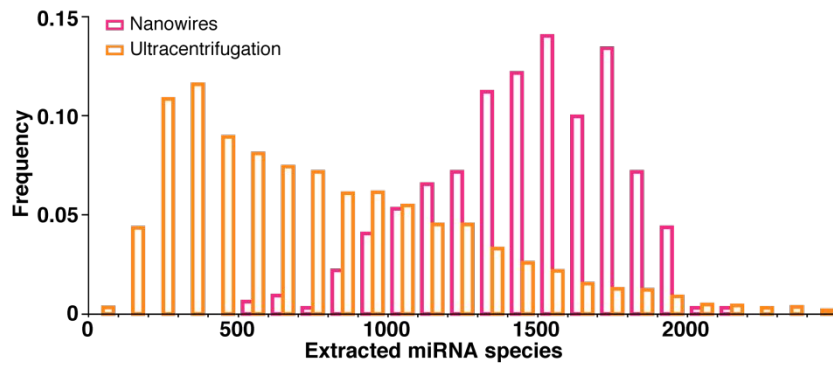

**Figure S2.** Histograms of extracted miRNA species obtained when using nanowire-based extraction (pink) and ultracentrifugation-based extraction (orange).

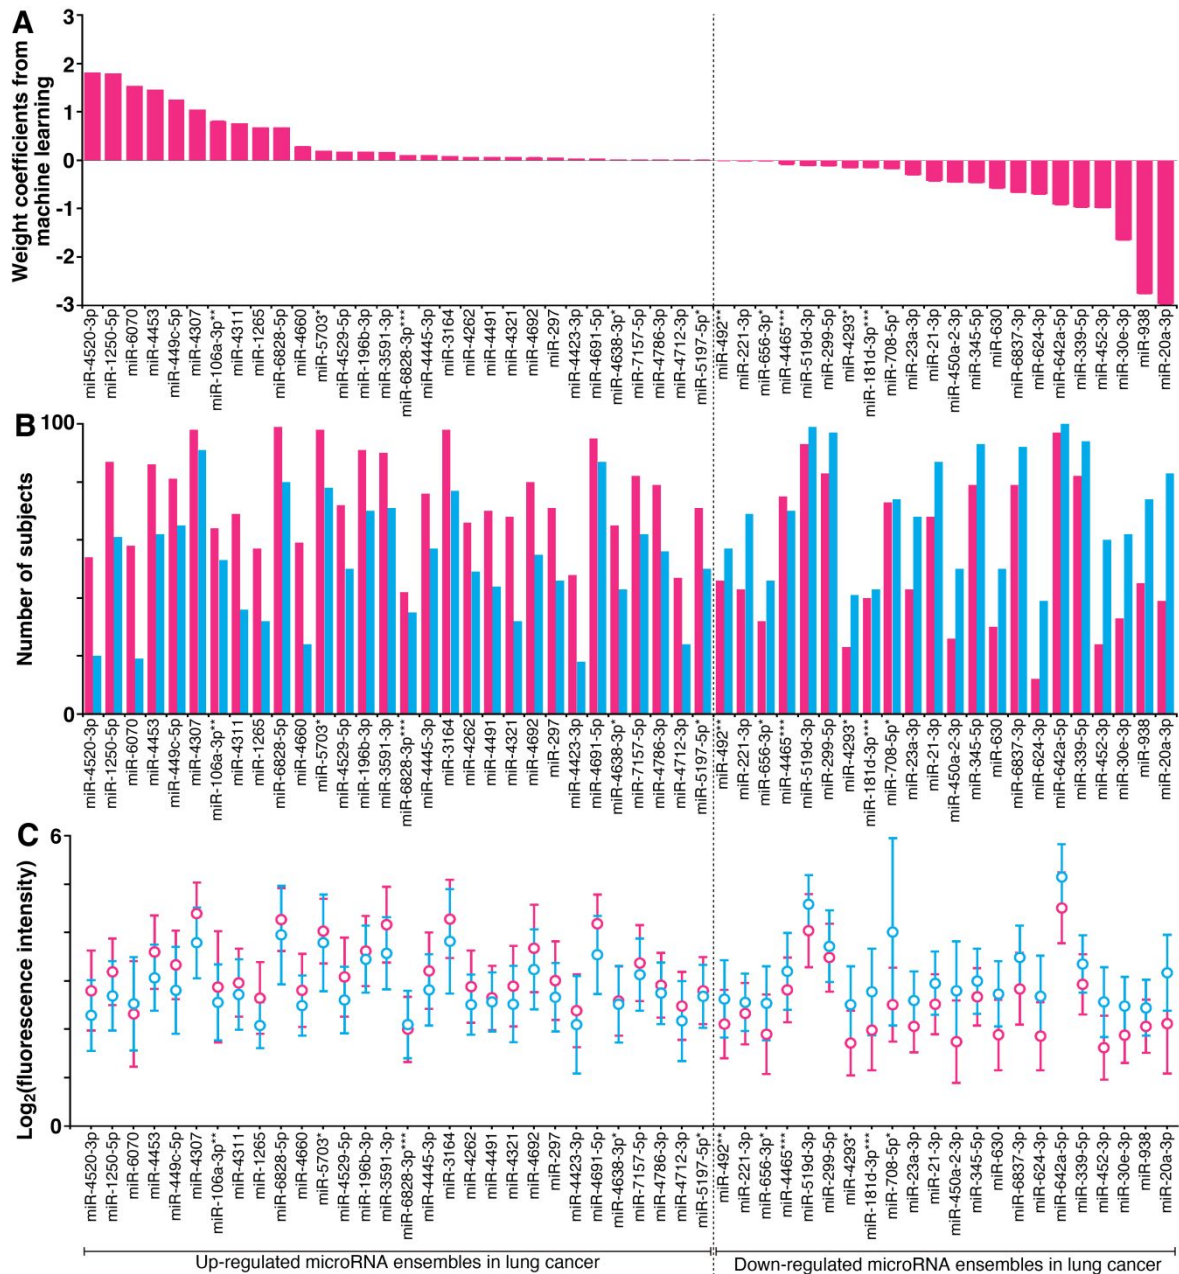

**Figure S3. (A) The miRNA species with an absolute value over 0.01 of the weight coefficients vs. (B) number of subjects or (C) logarithmic fluorescence intensity.** The asterisks indicate p values for each miRNA: none,  $p < 0.0005$ ; one asterisk,  $p < 0.005$ ; two asterisks,  $p < 0.05$ ; and three asterisks,  $p \geq 0.05$ . The black dotted line indicates a value of more than (left) or less than (right) 0 for the weight coefficient. (A) Error bars show the standard deviation for a series of analyses ( $N=3$ ). (B) Each miRNA species was not found in all urine samples examined, *e.g.*, only 54 lung cancer subjects had miR-4520-3p and 20 non-cancer subjects had miR-4520-3p. (c) The data points of fluorescence intensities for each miRNA species were calculated only from the number of subjects for each miRNA, *e.g.*,  $N=54$  for miR-4520-3p of lung cancer subjects and  $N=20$  for miR-4520-3p of non-cancer subjects. (B, C) Pink and cyan colors represent lung cancer and non-cancer subjects.

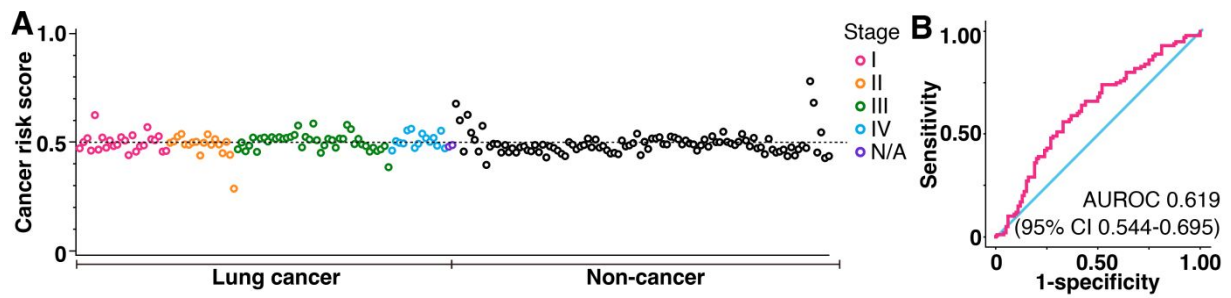

**Figure S4. Identifying non-significant miRNA ensembles.** (A, B) Cancer risk scores and AUROC curve for 100 lung cancer and 100 non-cancer subjects obtained using the non-significant urinary miRNA ensemble. The threshold for lung cancer risk is 0.5; among non-cancer subjects the value is below 0.5; and for cancer subjects it is more than or equal to 0.5. N/A represents stage as unknown. Repeating the cross validation 50 times (light orange area in Fig. 3a) provided classification performance of accuracy of 58.3%, sensitivity of 50.7%, and specificity of 65.9%.

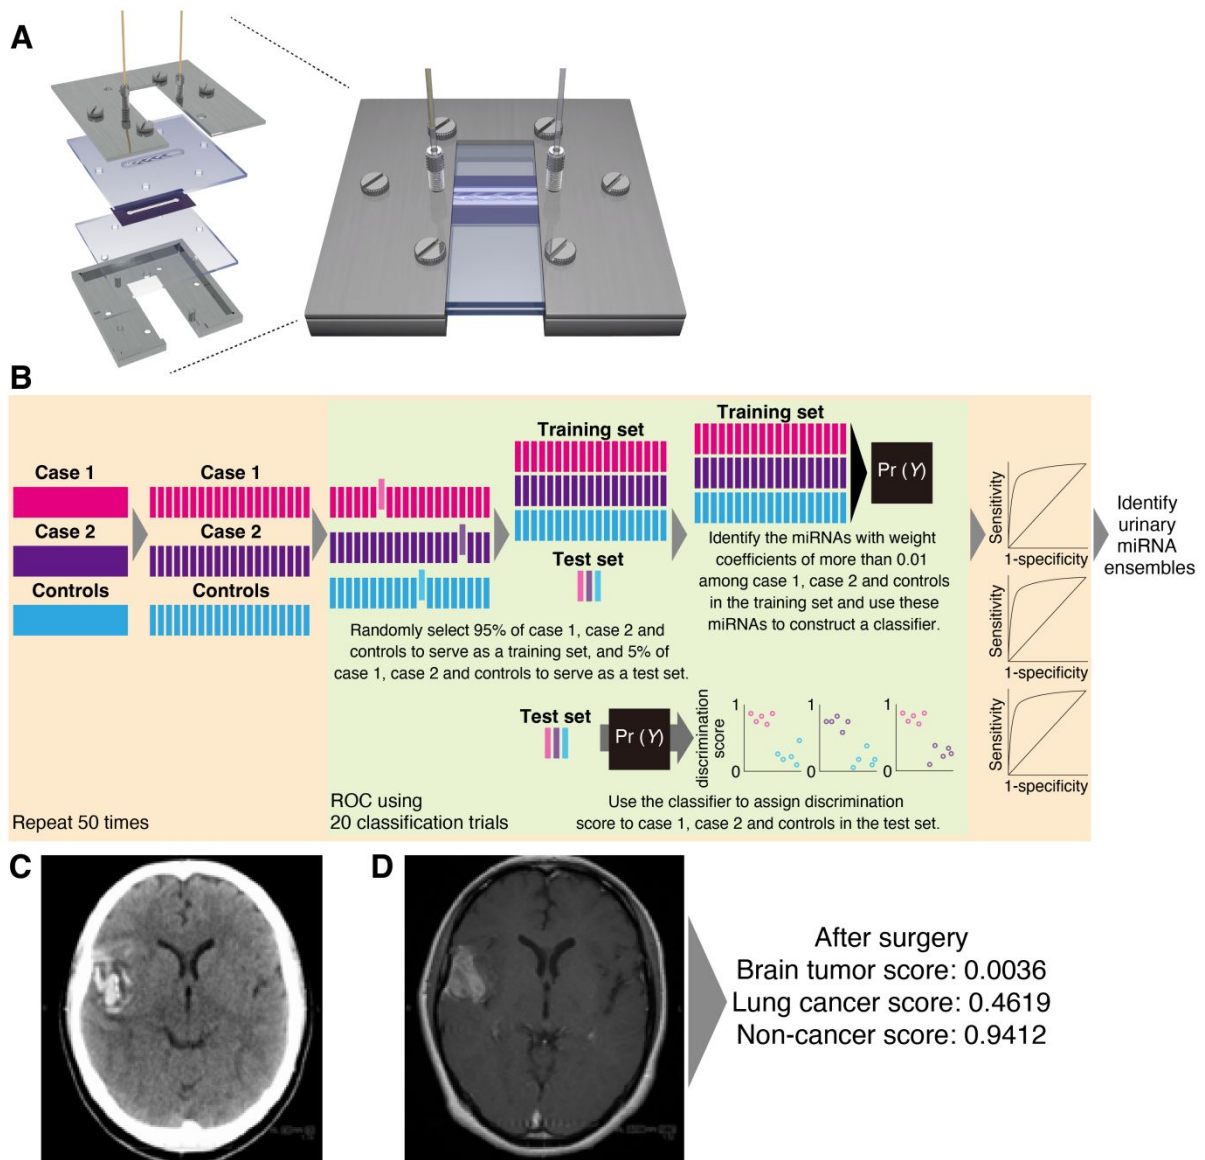

**Figure S5. Identifying urinary miRNA ensembles for classification of brain tumor, lung cancer, and non-cancer subjects.** (A) Schematic illustration of the nanowire microfluidic device used for classification of brain tumor, lung cancer, and non-cancer subjects. The device consisted of COP microfluidic resin, Si substrate with ZnO nanowires, COP resin, and a SUS holder. (B) Schematic illustration showing the identification of microRNA ensembles based on fluorescence intensity analysis of each miRNA species using a logistic regression-modeled 3-class classifier. (C) CT image of a 35-year-old female without a medical history complaining of headaches. Intracerebral hemorrhage at the right temporal lobe and subarachnoid hemorrhage in the right sylvian fissure with gyral calcification appeared in the image. (D) Post-contrast MRI for this female patient revealed a well circumscribed mass lesion at the right temporal lobe, suggesting presence of a brain tumor; the resected tumor was glioblastoma. After surgery, each discrimination score suggested she was a non-cancer subject.

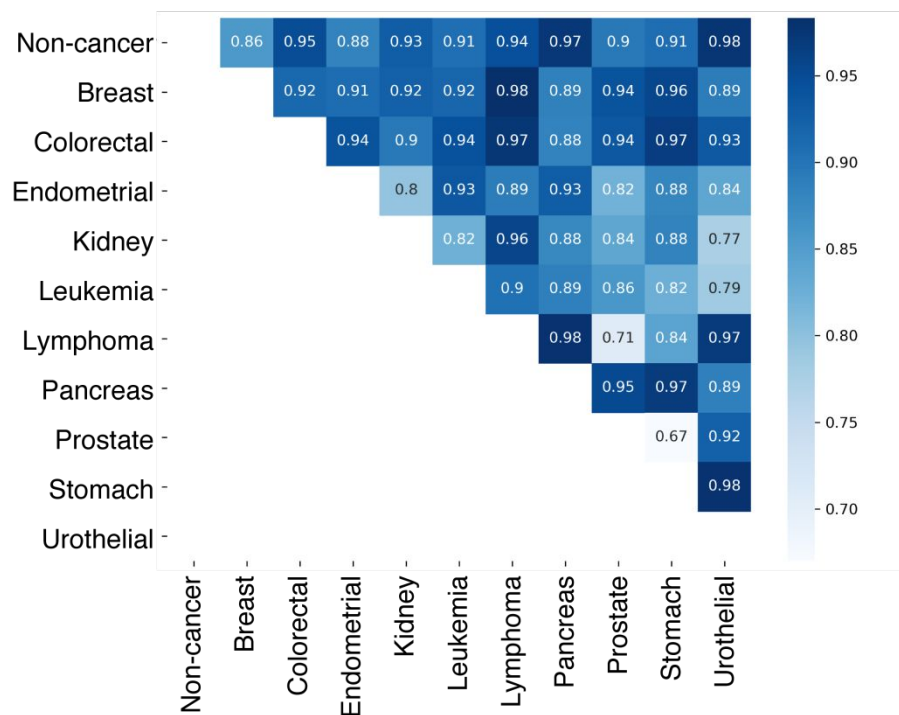

**Figure S6. Applicability of miRNA ensemble concept to 10 types of cancer.** Results of binary classifications among 10 cancer types and non-cancer subjects. Urine samples from 30 patients from each group were measured using the nanowire microfluidic device and classified with the binary logistic regression-model with leave-one-out cross-validation. The matrix shows the area under the ROC curve (AUROC) of the classification of two cohorts corresponding to the x and y-axes.

**Table S1.** Participant characteristics for lung cancer and non-cancer subjects.

| Characteristics           | Total (N=200) |
|---------------------------|---------------|
| Lung cancer, N            | 100           |
| Median age, years (range) | 61 (31-80)    |
| Sex, N                    |               |
| Male                      | 94            |
| Female                    | 6             |
| Clinical stage, N         |               |
| IA                        | 10            |
| IB                        | 14            |
| IIA                       | 10            |
| IIB                       | 8             |
| IIIA                      | 30            |
| IIIB                      | 11            |
| IV                        | 15            |
| Unknown                   | 2             |
| Smoking status, N         |               |
| Never smoked              | 6             |
| Former smoker             | 47            |
| Current smoker            | 47            |
| Non-cancer controls, N    | 100           |
| Median age, years (range) | 41 (25-70)    |
| Sex, N                    |               |
| Male                      | 58            |
| Female                    | 42            |
| Smoking status, N         |               |
| Never smoked              | 100           |
| Former smoker             | 0             |
| Current smoker            | 0             |



**Table S2.** A urinary miRNA ensemble composed of 53 miRNA species for classification between 100 lung cancer and 100 non-cancer subjects.

| MicroRNAs       | Weight coefficient | p value               | EV miRNAs confirmed by ExoCarta (released in July 2015) or Vesiclepedia (released in September 2023) |
|-----------------|--------------------|-----------------------|------------------------------------------------------------------------------------------------------|
| hsa-mir-4520-3p | 1.818              | $1.14 \times 10^{-7}$ | Confirmed                                                                                            |
| hsa-mir-1250-5p | 1.788              | $2.49 \times 10^{-8}$ | Confirmed                                                                                            |
| hsa-mir-6070    | 1.564              | $1.84 \times 10^{-7}$ | Not confirmed                                                                                        |
| hsa-mir-4453    | 1.441              | $2.15 \times 10^{-8}$ | Confirmed                                                                                            |
| hsa-mir-449c-5p | 1.251              | $1.24 \times 10^{-5}$ | Confirmed                                                                                            |
| hsa-mir-4307    | 1.043              | $2.26 \times 10^{-9}$ | Not confirmed                                                                                        |
| hsa-mir-106a-3p | 0.827              | $3.20 \times 10^{-2}$ | Confirmed                                                                                            |
| hsa-mir-4311    | 0.740              | $8.68 \times 10^{-7}$ | Confirmed                                                                                            |
| hsa-mir-1265    | 0.679              | $8.25 \times 10^{-6}$ | Not confirmed                                                                                        |
| hsa-mir-6828-5p | 0.673              | $8.76 \times 10^{-5}$ | Not confirmed                                                                                        |
| hsa-mir-4660    | 0.282              | $1.35 \times 10^{-7}$ | Confirmed                                                                                            |
| hsa-mir-4529-5p | 0.187              | $1.72 \times 10^{-5}$ | Not confirmed                                                                                        |
| hsa-mir-5703    | 0.180              | $9.17 \times 10^{-4}$ | Confirmed                                                                                            |
| hsa-mir-3591-3p | 0.177              | $1.42 \times 10^{-8}$ | Confirmed                                                                                            |
| hsa-mir-196b-3p | 0.146              | $2.33 \times 10^{-4}$ | Confirmed                                                                                            |
| hsa-mir-6828-3p | 0.104              | $4.11 \times 10^{-1}$ | Not confirmed                                                                                        |
| hsa-mir-4445-3p | 0.102              | $5.21 \times 10^{-5}$ | Not confirmed                                                                                        |
| hsa-mir-4321    | 0.096              | $9.56 \times 10^{-8}$ | Not confirmed                                                                                        |
| hsa-mir-3164    | 0.095              | $1.42 \times 10^{-7}$ | Confirmed                                                                                            |
| hsa-mir-4262    | 0.083              | $3.86 \times 10^{-4}$ | Not confirmed                                                                                        |
| hsa-mir-4491    | 0.078              | $2.54 \times 10^{-4}$ | Not confirmed                                                                                        |
| hsa-mir-4692    | 0.072              | $2.76 \times 10^{-6}$ | Confirmed                                                                                            |
| hsa-mir-4691-5p | 0.069              | $6.25 \times 10^{-9}$ | Confirmed                                                                                            |
| hsa-mir-297     | 0.049              | $3.12 \times 10^{-5}$ | Confirmed                                                                                            |
| hsa-mir-4423-3p | 0.044              | $1.71 \times 10^{-6}$ | Not confirmed                                                                                        |
| hsa-mir-7157-5p | 0.024              | $2.42 \times 10^{-4}$ | Not confirmed                                                                                        |
| hsa-mir-4712-3p | 0.020              | $3.25 \times 10^{-4}$ | Confirmed                                                                                            |

|                   |        |                        |               |
|-------------------|--------|------------------------|---------------|
| hsa-mir-4638-3p   | 0.019  | $3.05 \times 10^{-3}$  | Confirmed     |
| hsa-mir-2277-3p   | 0.013  | $8.54 \times 10^{-4}$  | Confirmed     |
| hsa-mir-5197-5p   | 0.012  | $2.70 \times 10^{-3}$  | Not confirmed |
| hsa-mir-1322      | 0.011  | $1.47 \times 10^{-4}$  | Confirmed     |
| hsa-mir-492       | -0.011 | $6.10 \times 10^{-3}$  | Confirmed     |
| hsa-mir-98-3p     | -0.014 | $6.00 \times 10^{-6}$  | Confirmed     |
| hsa-mir-221-3p    | -0.015 | $3.50 \times 10^{-5}$  | Confirmed     |
| hsa-mir-4465      | -0.083 | $1.84 \times 10^{-1}$  | Not confirmed |
| hsa-mir-519d-3p   | -0.108 | $4.540 \times 10^{-8}$ | Confirmed     |
| hsa-mir-299-5p    | -0.116 | $1.97 \times 10^{-4}$  | Confirmed     |
| hsa-mir-4293      | -0.164 | $6.90 \times 10^{-4}$  | Not confirmed |
| hsa-mir-708-5p    | -0.168 | $8.35 \times 10^{-4}$  | Confirmed     |
| hsa-mir-181d-3p   | -0.186 | $9.89 \times 10^{-2}$  | Confirmed     |
| hsa-mir-23a-3p    | -0.308 | $8.69 \times 10^{-7}$  | Confirmed     |
| hsa-mir-21-3p     | -0.440 | $2.68 \times 10^{-7}$  | Confirmed     |
| hsa-mir-450a-2-3p | -0.461 | $1.16 \times 10^{-5}$  | Confirmed     |
| hsa-mir-345-5p    | -0.495 | $1.87 \times 10^{-5}$  | Confirmed     |
| hsa-mir-630       | -0.585 | $6.05 \times 10^{-5}$  | Confirmed     |
| hsa-mir-6837-3p   | -0.667 | $3.40 \times 10^{-9}$  | Confirmed     |
| hsa-mir-624-3p    | -0.725 | $1.69 \times 10^{-6}$  | Confirmed     |
| hsa-mir-642a-5p   | -0.926 | $5.73 \times 10^{-10}$ | Confirmed     |
| hsa-mir-452-3p    | -0.960 | $6.05 \times 10^{-10}$ | Confirmed     |
| hsa-mir-339-5p    | -0.967 | $1.96 \times 10^{-7}$  | Confirmed     |
| hsa-mir-30e-3p    | -1.636 | $1.22 \times 10^{-7}$  | Confirmed     |
| hsa-mir-938       | -2.770 | $1.60 \times 10^{-7}$  | Not confirmed |
| hsa-mir-20a-3p    | -2.977 | $1.95 \times 10^{-16}$ | Confirmed     |

**Table S3.** A non-significant urinary miRNA ensemble composed of 59 miRNA species for classification between 100 lung cancer and 100 non-cancer subjects.

| MicroRNAs       | Weight coefficient | p value                | EV miRNAs confirmed by ExoCarta (released in July 2015) or Vesiclepedia (released in September 2023) |
|-----------------|--------------------|------------------------|------------------------------------------------------------------------------------------------------|
| hsa-miR-1228-5p | -                  | $4.96 \times 10^{-2}$  | Confirmed                                                                                            |
| hsa-miR-1237-5p | -                  | $4.93 \times 10^{-2}$  | Not confirmed                                                                                        |
| hsa-miR-1268a   | -                  | $9.50 \times 10^{-1}$  | Confirmed                                                                                            |
| hsa-miR-1275    | -0.925             | $2.31 \times 10^{-6}$  | Confirmed                                                                                            |
| hsa-miR-1343-5p | -                  | $1.71 \times 10^{-1}$  | Confirmed                                                                                            |
| hsa-miR-1469    | -                  | $1.57 \times 10^{-2}$  | Confirmed                                                                                            |
| hsa-miR-1908-5p | -                  | $3.84 \times 10^{-1}$  | Confirmed                                                                                            |
| hsa-miR-1914-3p | -                  | $1.756 \times 10^{-3}$ | Confirmed                                                                                            |
| hsa-miR-2861    | -                  | $1.68 \times 10^{-5}$  | Confirmed                                                                                            |
| hsa-miR-3131    | 0.007              | $8.79 \times 10^{-2}$  | Confirmed                                                                                            |
| hsa-miR-3178    | -                  | $9.41 \times 10^{-1}$  | Confirmed                                                                                            |
| hsa-miR-3196    | -                  | $2.45 \times 10^{-1}$  | Confirmed                                                                                            |
| hsa-miR-3197    | -                  | $1.23 \times 10^{-1}$  | Confirmed                                                                                            |
| hsa-miR-3648    | -                  | $4.28 \times 10^{-1}$  | Confirmed                                                                                            |
| hsa-miR-3656    | -                  | $5.55 \times 10^{-1}$  | Confirmed                                                                                            |
| hsa-miR-3663-3p | 0.001              | $7.41 \times 10^{-1}$  | Confirmed                                                                                            |
| hsa-miR-3665    | -                  | $2.36 \times 10^{-3}$  | Confirmed                                                                                            |
| hsa-miR-371a-5p | -1.186             | $2.97 \times 10^{-6}$  | Confirmed                                                                                            |
| hsa-miR-3940-5p | -                  | $1.47 \times 10^{-1}$  | Confirmed                                                                                            |
| hsa-miR-4270    | -                  | $7.63 \times 10^{-2}$  | Not confirmed                                                                                        |
| hsa-miR-4442    | -                  | $6.86 \times 10^{-4}$  | Confirmed                                                                                            |
| hsa-miR-4463    | -                  | $4.50 \times 10^{-2}$  | Confirmed                                                                                            |
| hsa-miR-4488    | -                  | $2.85 \times 10^{-1}$  | Confirmed                                                                                            |
| hsa-miR-4492    | -0.429             | $5.43 \times 10^{-4}$  | Confirmed                                                                                            |
| hsa-miR-4508    | -                  | $2.51 \times 10^{-2}$  | Confirmed                                                                                            |
| hsa-miR-4516    | -                  | $1.33 \times 10^{-1}$  | Confirmed                                                                                            |
| hsa-miR-4534    | -                  | $3.84 \times 10^{-2}$  | Confirmed                                                                                            |

|                 |        |                       |               |
|-----------------|--------|-----------------------|---------------|
| hsa-miR-4632-5p | -      | $2.70 \times 10^{-1}$ | Confirmed     |
| hsa-miR-4649-5p | 0.010  | $7.02 \times 10^{-1}$ | Not confirmed |
| hsa-miR-4675    | -      | $4.63 \times 10^{-2}$ | Not confirmed |
| hsa-miR-4689    | -      | $4.07 \times 10^{-5}$ | Confirmed     |
| hsa-miR-4723-5p | -      | $9.83 \times 10^{-2}$ | Not confirmed |
| hsa-miR-4728-5p | -      | $2.20 \times 10^{-1}$ | Confirmed     |
| hsa-miR-4741    | 0.002  | $4.01 \times 10^{-1}$ | Confirmed     |
| hsa-miR-4787-5p | -      | $1.03 \times 10^{-3}$ | Confirmed     |
| hsa-miR-5787    | -0.002 | $1.01 \times 10^{-4}$ | Confirmed     |
| hsa-miR-6089    | -      | $1.86 \times 10^{-2}$ | Confirmed     |
| hsa-miR-6090    | -      | $3.10 \times 10^{-1}$ | Confirmed     |
| hsa-miR-6165    | -      | $1.83 \times 10^{-2}$ | Confirmed     |
| hsa-miR-642b-3p | -0.025 | $4.29 \times 10^{-5}$ | Confirmed     |
| hsa-miR-6727-5p | -      | $2.90 \times 10^{-2}$ | Confirmed     |
| hsa-miR-6756-5p | 0.009  | $6.02 \times 10^{-1}$ | Not confirmed |
| hsa-miR-6757-5p | -      | $6.99 \times 10^{-5}$ | Not confirmed |
| hsa-miR-6765-5p | -      | $4.54 \times 10^{-3}$ | Confirmed     |
| hsa-miR-6771-5p | -      | $9.30 \times 10^{-2}$ | Not confirmed |
| hsa-miR-6785-5p | -      | $3.41 \times 10^{-1}$ | Confirmed     |
| hsa-miR-6786-5p | -      | $3.76 \times 10^{-4}$ | Not confirmed |
| hsa-miR-6802-5p | -      | $1.11 \times 10^{-4}$ | Confirmed     |
| hsa-miR-6803-5p | -      | $1.76 \times 10^{-2}$ | Not confirmed |
| hsa-miR-6805-5p | -      | $4.14 \times 10^{-2}$ | Confirmed     |
| hsa-miR-6816-5p | -      | $4.96 \times 10^{-3}$ | Confirmed     |
| hsa-miR-6869-5p | -0.033 | $1.45 \times 10^{-3}$ | Confirmed     |
| hsa-miR-6885-5p | -0.056 | $1.95 \times 10^{-8}$ | Confirmed     |
| hsa-miR-7111-5p | 0.011  | $4.29 \times 10^{-1}$ | Not confirmed |
| hsa-miR-762     | 0.0003 | $7.70 \times 10^{-1}$ | Confirmed     |
| hsa-miR-7704    | -      | $2.07 \times 10^{-2}$ | Confirmed     |
| hsa-miR-7845-5p | 1.698  | $7.15 \times 10^{-1}$ | Confirmed     |
| hsa-miR-7847-3p | -      | $7.09 \times 10^{-1}$ | Confirmed     |
| hsa-miR-8072    | -      | $3.42 \times 10^{-1}$ | Confirmed     |

**Table S4** A urinary miRNA ensemble composed of 40 miRNA species for classification between 24 stage I lung cancer and 25 non-cancer subjects.

| MicroRNAs         | Weight coefficient | p value                | EV miRNAs confirmed by ExoCarta (released in July 2015) or Vesiclepedia (released in September 2023) |
|-------------------|--------------------|------------------------|------------------------------------------------------------------------------------------------------|
| hsa-let-7e-5p     | -0.4916616         | $1.31 \times 10^{-4}$  | Confirmed                                                                                            |
| hsa-mir-106a-3p   | 0.2198091          | $3.20 \times 10^{-2}$  | Confirmed                                                                                            |
| hsa-mir-1250-5p   | 0.38910012         | $2.49 \times 10^{-8}$  | Confirmed                                                                                            |
| hsa-mir-1265      | 0.02028816         | $8.25 \times 10^{-6}$  | Not confirmed                                                                                        |
| hsa-mir-20a-3p    | -3.014025          | $1.95 \times 10^{-16}$ | Confirmed                                                                                            |
| hsa-mir-30e-3p    | -0.7914333         | $1.22 \times 10^{-7}$  | Confirmed                                                                                            |
| hsa-mir-3126-5p   | 0.19274675         | $6.59 \times 10^{-4}$  | Not confirmed                                                                                        |
| hsa-mir-3164      | 1.06239609         | $1.42 \times 10^{-7}$  | Confirmed                                                                                            |
| hsa-mir-339-5p    | -1.6905226         | $1.96 \times 10^{-7}$  | Confirmed                                                                                            |
| hsa-mir-378d      | 0.06752894         | $2.98 \times 10^{-1}$  | Confirmed                                                                                            |
| hsa-mir-3913-3p   | 0.41151482         | $9.80 \times 10^{-3}$  | Confirmed                                                                                            |
| hsa-mir-4262      | 0.14678614         | $3.83 \times 10^{-4}$  | Not confirmed                                                                                        |
| hsa-mir-4307      | 1.12674427         | $2.26 \times 10^{-9}$  | Not confirmed                                                                                        |
| hsa-mir-4311      | 1.04797204         | $8.68 \times 10^{-7}$  | Confirmed                                                                                            |
| hsa-mir-4453      | 1.17142828         | $2.15 \times 10^{-8}$  | Confirmed                                                                                            |
| hsa-mir-4491      | 0.45602348         | $2.54 \times 10^{-4}$  | Not confirmed                                                                                        |
| hsa-mir-449c-5p   | 1.44450258         | $1.24 \times 10^{-5}$  | Confirmed                                                                                            |
| hsa-mir-450a-2-3p | -1.417064          | $1.16 \times 10^{-5}$  | Confirmed                                                                                            |
| hsa-mir-4520-3p   | 0.51308889         | $1.14 \times 10^{-7}$  | Confirmed                                                                                            |
| hsa-mir-452-3p    | -0.7470428         | $6.05 \times 10^{-10}$ | Confirmed                                                                                            |
| hsa-mir-4529-5p   | 0.19114809         | $1.72 \times 10^{-5}$  | Not confirmed                                                                                        |
| hsa-mir-4638-3p   | 0.65779458         | $3.05 \times 10^{-3}$  | Confirmed                                                                                            |
| hsa-mir-6070      | 0.92679243         | $1.84 \times 10^{-7}$  | Not confirmed                                                                                        |
| hsa-mir-624-3p    | -0.3289615         | $1.69 \times 10^{-6}$  | Confirmed                                                                                            |
| hsa-mir-630       | -0.4452697         | $6.05 \times 10^{-5}$  | Confirmed                                                                                            |
| hsa-mir-640       | -0.4107503         | $3.14 \times 10^{-7}$  | Not confirmed                                                                                        |
| hsa-mir-642a-5p   | -0.4642681         | $5.73 \times 10^{-10}$ | Confirmed                                                                                            |

|                 |            |                       |               |
|-----------------|------------|-----------------------|---------------|
| hsa-mir-6828-5p | 1.09639229 | $8.76 \times 10^{-5}$ | Not confirmed |
| hsa-mir-6837-3p | -0.4870758 | $3.40 \times 10^{-9}$ | Confirmed     |
| hsa-mir-938     | -2.5933995 | $1.60 \times 10^{-7}$ | Not confirmed |

**Table S5** Participant characteristics for brain tumor, lung cancer, and non-cancer subjects.

| Characteristics                                               | Total (N=319) |
|---------------------------------------------------------------|---------------|
| Brain tumors, N                                               | 110           |
| Median age, years (range)                                     | 53 (2-86)     |
| Sex, N (%)                                                    |               |
| Male                                                          | 56 (50.9)     |
| Female                                                        | 54 (49.1)     |
| Diagnosis                                                     |               |
| Glioblastoma, N (%)                                           | 26 (23.6)     |
| Glioblastoma, IDH-mutant                                      | 7             |
| Glioblastoma, IDH-wildtype                                    | 19            |
| Lower grade glioma, N (%)                                     | 34 (30.9)     |
| Diffuse astrocytoma, IDH-mutant                               | 8             |
| <i>Diffuse astrocytoma, IDH-wildtype</i>                      | 6             |
| Anaplastic astrocytoma, IDH-mutant                            | 3             |
| <i>Anaplastic astrocytoma, IDH-wildtype</i>                   | 4             |
| Oligodendroglioma, IDH-mutant and 1p/19q-codeleted            | 11            |
| Anaplastic oligodendroglioma, IDH-mutant and 1p/19q-codeleted | 2             |
| Meningioma, N (%)                                             | 27 (24.5)     |
| WHO grade I                                                   | 26            |
| grade II                                                      | 0             |
| grade III                                                     | 1             |
| Other brain tumors, N (%)                                     | 23 (20.9)     |
| Lung cancer, N                                                | 93            |
| Median age, years (range)                                     | 61 (31-80)    |
| Sex, N                                                        |               |
| Male                                                          | 87            |
| Female                                                        | 6             |
| Clinical stage, N                                             |               |
| IA                                                            | 9             |
| IB                                                            | 14            |
| IIA                                                           | 10            |
| IIB                                                           | 7             |

|                           |            |
|---------------------------|------------|
| III A                     | 26         |
| III B                     | 10         |
| IV                        | 15         |
| Unknown                   | 2          |
| Smoking status, N         |            |
| Never smoked              | 3          |
| Former smoker             | 45         |
| Current smoker            | 45         |
| Non-cancer controls, N    | 116        |
| Median age, years (range) | 42 (20-69) |
| Sex, N                    |            |
| Male                      | 50         |
| Female                    | 66         |
| Smoking status, N         |            |
| Never smoked              | 116        |
| Former smoker             | 0          |
| Current smoker            | 0          |

---
